# Supplementary material for: Multiplexing of ChIP-Seq Samples in an Optimized Experimental Condition Has Minimal Impact on Peak Detection
Source: PLOS journal article supplement (doi:10.1371/journal.pone.0129350), 2015-06-11

**Figure S1. Peak detection by MACS2.** The mean number of peaks identified for each sample by multiplex level as number of reads.

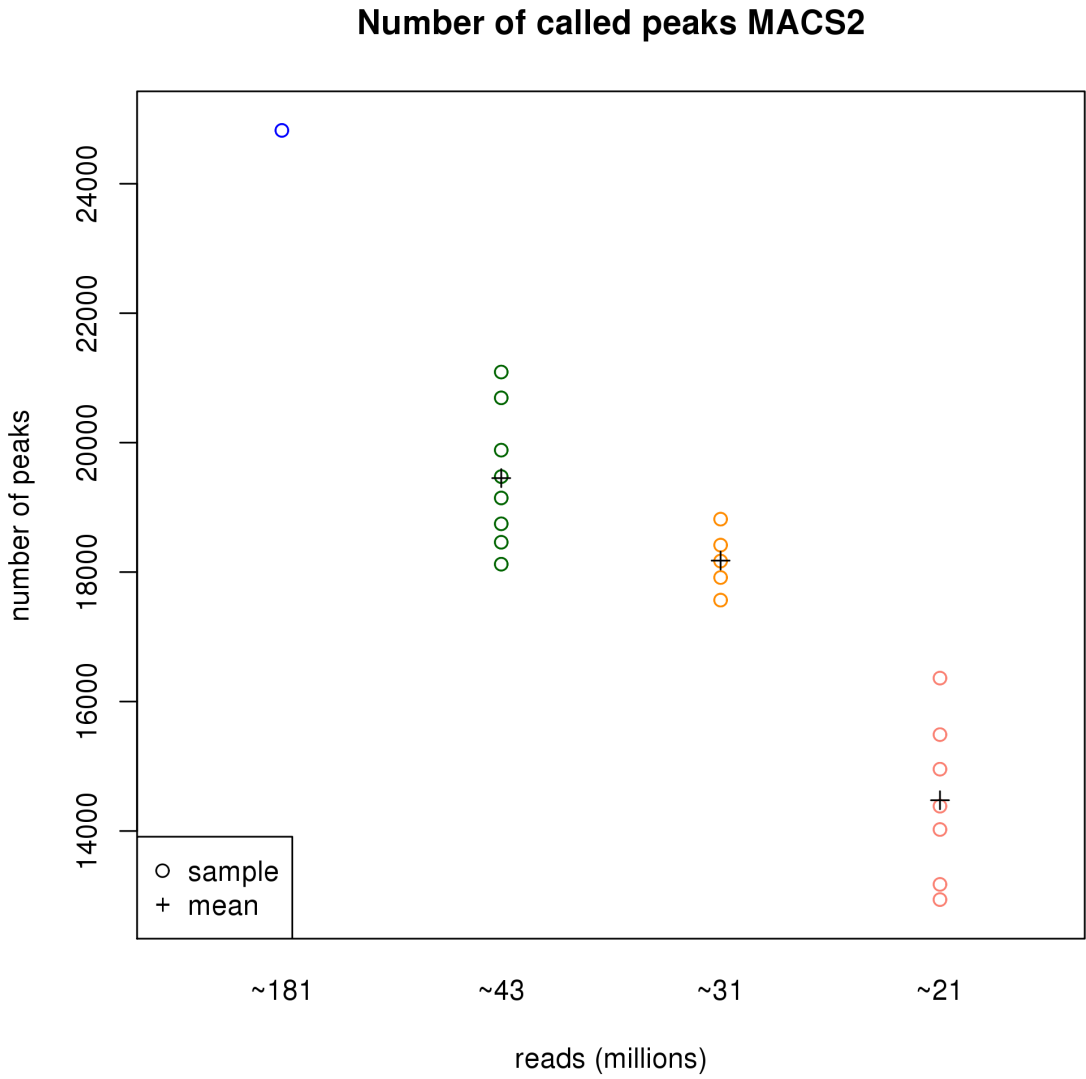

Supplement: S1 (10.1371/journal.pone.0129350.s001) [file journal.pone.0129350.s001]
