# Supplementary material for: Multiplexing of ChIP-Seq Samples in an Optimized Experimental Condition Has Minimal Impact on Peak Detection
Source: PLOS journal article supplement (doi:10.1371/journal.pone.0129350), 2015-06-11

**Figure S4. Empirical cumulative distribution function (CDF) of difference in peak apex position from 1-plex.**

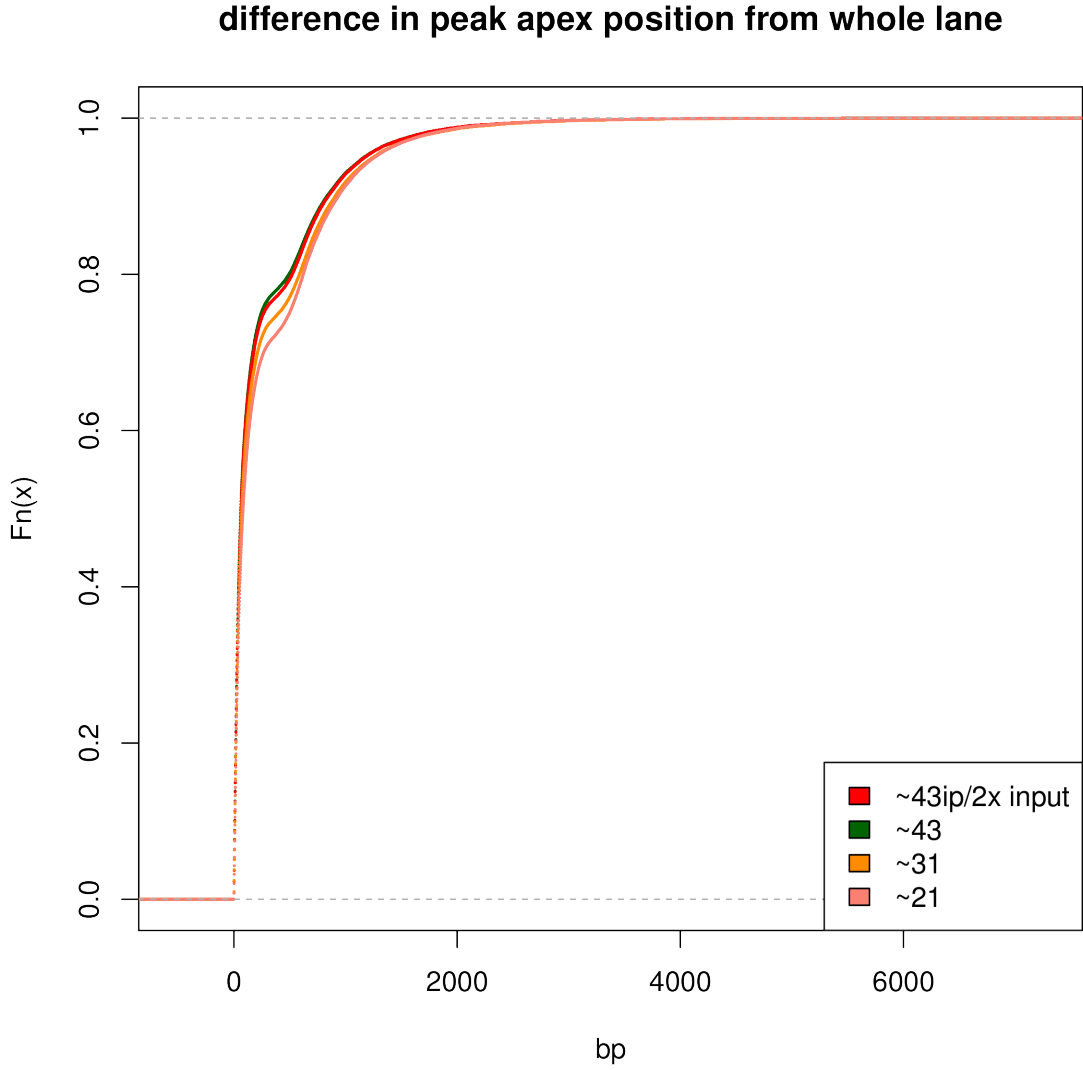

Supplement: S4 (10.1371/journal.pone.0129350.s004) [file journal.pone.0129350.s004]
