# Supplementary material for: Multiplexing of ChIP-Seq Samples in an Optimized Experimental Condition Has Minimal Impact on Peak Detection
Source: PLOS journal article supplement (doi:10.1371/journal.pone.0129350), 2015-06-11

**Figure S7. Comparison of overlap of unique gene annotations on peaks called by ChIPseeqer and MACS2.** Fewer unique gene annotations were detected by MACS2 but there was a high degree of overlap (mean percent overlap = 95.8% +/- 4.7%).

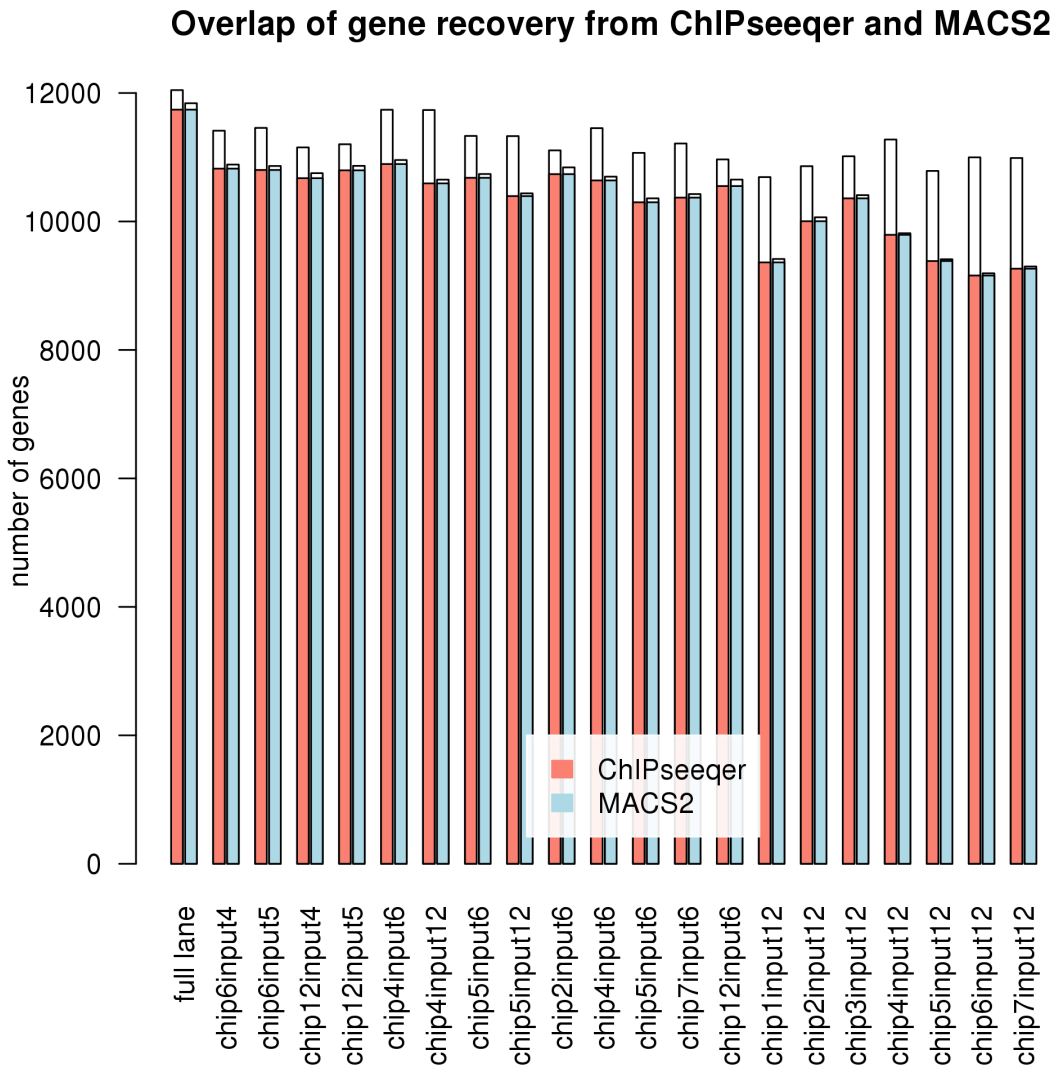

Supplement: S7 (10.1371/journal.pone.0129350.s007) [file journal.pone.0129350.s007]
